# Supplementary material
Source: publisher figshare collection journal article supplement (https://acs.figshare.com/ndownloader/files/4024492)
Supplement: Supplementary file 1 [file 4024492]

Supplemental Information for

**Universal Microfluidic Automaton for Autonomous Sample  
Processing: Application to the Mars Organic Analyzer**

Jungkyu Kim<sup>#</sup>, Erik C. Jensen<sup>†</sup>, Amanda M. Stockton<sup>‡</sup> and Richard A. Mathies\*

Department of Chemistry, University of California, Berkeley, CA 94720

\* Address correspondence to: Richard A. Mathies

Department of Chemistry  
University of California  
Berkeley, CA 94720

Phone: (510) 642-4192

Fax: (510) 642-3599

E-mail: [ramathies@berkeley.edu](mailto:ramathies@berkeley.edu)

# Current Address: Department of Mechanical Engineering, Texas Tech University, Lubbock, TX 79409

† Current Address: HJ Science & Technology, 187 Saratoga Avenue, Santa Clara, CA 95050

‡ Current Address: Jet Propulsion Laboratory, 4800 Oak Grove Drive, Pasadena, CA 91109

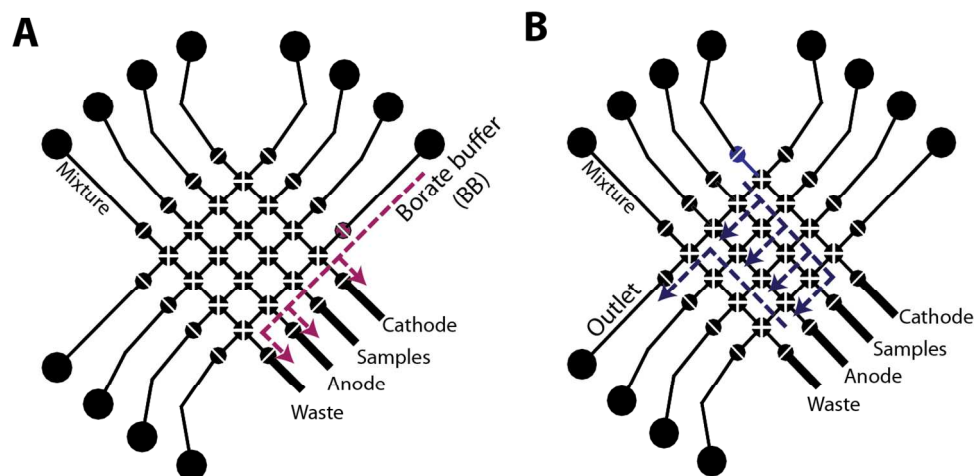

**Figure SI1.** Detail of (A) buffer loading process and (B) washing process.

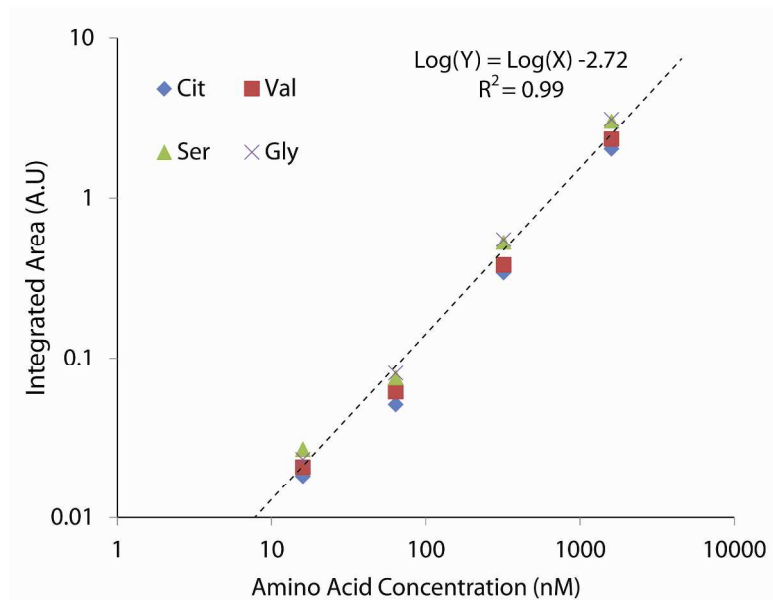

**Figure SI2.** Integrated peak area as a function of 4 different amino acid concentrations resulting from the automated sample processing program. There is a log-linear correlation between concentration and integrated area as expected.

**Table SI1-1.** Off-chip vs. on-chip labeling and separation of an amino acid standard.

|                   | <b>Labeling Efficiency</b><br>(Peak Area, Rel. Fluorescence Units) |                    | <b>Separation Efficiency</b><br>(Peak Efficiency, Theoretical Plates) |                                     |
|-------------------|--------------------------------------------------------------------|--------------------|-----------------------------------------------------------------------|-------------------------------------|
|                   | Off-Chip Manual                                                    | On-Chip Autonomous | Off-Chip Manual                                                       | On-Chip Autonomous                  |
| Cit               | 0.44                                                               | 0.53               | $2.9 \times 10^5$                                                     | $2.5 \times 10^5$                   |
| Val               | 0.46                                                               | 0.57               | $2.8 \times 10^5$                                                     | $2.4 \times 10^5$                   |
| Ser               | 0.55                                                               | 0.74               | $2.7 \times 10^5$                                                     | $2.2 \times 10^5$                   |
| Ala               | 0.21                                                               | 0.28               | $2.7 \times 10^5$                                                     | $2.2 \times 10^5$                   |
| Gly               | 0.70                                                               | 0.95               | $2.4 \times 10^5$                                                     | $2.2 \times 10^5$                   |
| Glu               | 0.41                                                               | 0.61               | $1.8 \times 10^5$                                                     | $1.5 \times 10^5$                   |
| Asp               | 0.23                                                               | 0.31               | $1.8 \times 10^5$                                                     | $1.7 \times 10^5$                   |
| <b>Average</b>    | <b>0.43</b>                                                        | <b>0.57</b>        | <b><math>2.5 \times 10^5</math></b>                                   | <b><math>2.1 \times 10^5</math></b> |
| <b>Normalized</b> | <b>1.0</b>                                                         | <b>1.3</b>         | <b>1.0</b>                                                            | <b>0.9</b>                          |

**Table SI1-2.** Off-chip vs. on-chip labeling and separation of an aldehyde and ketone standard.

|                    | <b>Labeling Efficiency</b><br>(Peak Area, Rel. Fluorescence Units) |                    | <b>Separation Efficiency</b><br>(Peak Efficiency, Theoretical Plates) |                                     |
|--------------------|--------------------------------------------------------------------|--------------------|-----------------------------------------------------------------------|-------------------------------------|
|                    | Off-Chip Manual                                                    | On-Chip Autonomous | Off-Chip Manual                                                       | On-Chip Autonomous                  |
| Methylethyl ketone | 0.25                                                               | 0.17               | $3.5 \times 10^5$                                                     | $3.6 \times 10^5$                   |
| Propionaldehyde    | 1.9                                                                | 1.3                | $3.1 \times 10^5$                                                     | $3.3 \times 10^5$                   |
| Acetaldehyde (1)   | 1.7                                                                | 1.2                | $2.9 \times 10^5$                                                     | $3.2 \times 10^5$                   |
| Acetaldehyde (2)   | 0.21                                                               | 0.14               | $2.5 \times 10^5$                                                     | $2.8 \times 10^5$                   |
| Formaldehyde       | 1.7                                                                | 1.2                | $4.0 \times 10^5$                                                     | $3.3 \times 10^5$                   |
| <b>Average</b>     | <b>1.1</b>                                                         | <b>0.82</b>        | <b><math>3.2 \times 10^5</math></b>                                   | <b><math>3.2 \times 10^5</math></b> |
| <b>Normalized</b>  | <b>1.0</b>                                                         | <b>0.8</b>         | <b>1.0</b>                                                            | <b>1.0</b>                          |

**Table SI1-3.** Off-chip vs. on-chip labeling and separation of a carboxylic acid standard.

|                   | <b>Labeling Efficiency</b><br>(Peak Area, Rel. Fluorescence Units) |                    | <b>Separation Efficiency</b><br>(Peak Efficiency, Theoretical Plates) |                                     |
|-------------------|--------------------------------------------------------------------|--------------------|-----------------------------------------------------------------------|-------------------------------------|
|                   | Off-Chip Manual                                                    | On-Chip Autonomous | Off-Chip Manual                                                       | On-Chip Autonomous                  |
| Valeric acid      | 0.28                                                               | 0.33               | $0.6 \times 10^5$                                                     | $0.5 \times 10^5$                   |
| Butanoic acid     | 0.32                                                               | 0.42               | $1.0 \times 10^5$                                                     | $0.8 \times 10^5$                   |
| Propionic acid    | 0.66                                                               | 0.87               | $2.1 \times 10^5$                                                     | $1.2 \times 10^5$                   |
| Acetic acid       | 0.37                                                               | 0.54               | $1.0 \times 10^5$                                                     | $0.8 \times 10^5$                   |
| Formic acid       | 0.63                                                               | 1.0                | $0.9 \times 10^5$                                                     | $0.8 \times 10^5$                   |
| <b>Average</b>    | <b>0.45</b>                                                        | <b>0.64</b>        | <b><math>1.1 \times 10^5</math></b>                                   | <b><math>0.8 \times 10^5</math></b> |
| <b>Normalized</b> | <b>1.0</b>                                                         | <b>1.4</b>         | <b>1.0</b>                                                            | <b>0.7</b>                          |

**Table SI02.** Separation characteristics from figure 5E

| Total Analysis      |              |                        |                      |                               | Amino Acid Analysis  |                               | Aldehyde / Ketone Analysis |                               | Carboxylic Acid Analysis |                               |
|---------------------|--------------|------------------------|----------------------|-------------------------------|----------------------|-------------------------------|----------------------------|-------------------------------|--------------------------|-------------------------------|
| <i>Species</i>      | <i>Conc.</i> | <i>Signal-to-Noise</i> | <i>N<sup>a</sup></i> | <i>Resolution<sup>b</sup></i> | <i>N<sup>a</sup></i> | <i>Resolution<sup>b</sup></i> | <i>N<sup>a</sup></i>       | <i>Resolution<sup>b</sup></i> | <i>N<sup>a</sup></i>     | <i>Resolution<sup>b</sup></i> |
| <b>Cit</b>          | 400 nM       | 1200                   | $3.6 \times 10^5$    |                               | $3.7 \times 10^5$    |                               |                            |                               |                          |                               |
| <b>Val</b>          | 400 nM       | 1300                   | $3.4 \times 10^5$    | 7.7                           | $3.6 \times 10^5$    | 7.9                           |                            |                               |                          |                               |
| <b>Ser</b>          | 400 nM       | 1200                   | $3.2 \times 10^5$    | 6.0                           | $3.3 \times 10^5$    | 6.1                           |                            |                               |                          |                               |
| <b>Gly</b>          | 400 nM       | 1500                   | $2.9 \times 10^5$    | 7.8                           | $3.0 \times 10^5$    | 8.0                           |                            |                               |                          |                               |
| <b>Acetone</b>      | 400 nM       | 4000                   | $2.9 \times 10^5$    | 15                            |                      |                               | $3.0 \times 10^5$          |                               |                          |                               |
| <b>PB (1)</b>       |              | 900                    | $2.8 \times 10^5$    | 0.66                          | $2.6 \times 10^5$    | 16                            |                            |                               |                          |                               |
| <b>Acetic acid</b>  | 400 nM       | 2800                   | $1.3 \times 10^5$    | 3.3                           |                      |                               |                            |                               | $1.3 \times 10^5$        |                               |
| <b>PB (2)</b>       |              | 1200                   | $2.8 \times 10^5$    | 0.96                          | $3.2 \times 10^5$    | 5.4                           |                            |                               |                          |                               |
| <b>Formaldehyde</b> | 40 nM        | 4100                   | $2.8 \times 10^5$    | 5.3                           |                      |                               | $2.7 \times 10^5$          | 11                            |                          |                               |
| <b>CB</b>           |              | NA <sup>c</sup>        | NA <sup>c</sup>      | 4.2                           |                      |                               | NA <sup>c</sup>            | 4.4 <sup>d</sup>              | NA <sup>c</sup>          | 9.6 <sup>d</sup>              |
| <b>Formic acid</b>  | 40 nM        | 4100                   | $1.0 \times 10^5$    | 4.2 <sup>d</sup>              |                      |                               |                            |                               | $1.1 \times 10^5$        | 5.2 <sup>d</sup>              |

<sup>a</sup> Peak efficiency (theoretical plates).

<sup>b</sup> Resolution between the peak indicated and the previously eluting peak in the separation.

<sup>c</sup> Cannot be quantified in this electropherogram due to detector saturation.

<sup>d</sup> Estimated.
